# Supplementary material
Source: PubMed Central journal article supplement (PMC8176385)

## Supplemental Online Content

Liuska PJ, Lemmelä S, Havulinna AS, et al; FinnGen Consortium. Association of the *MYOC* p.(Gln368Ter) variant with glaucoma in a Finnish population. *JAMA Ophthalmol*. Published online June 3, 2021. doi:10.1001/jamaophthalmol.2021.1610

**eTable.** List of Glaucoma End Point Definitions

**eFigure.** Allele Frequencies of the Myocilin (*MYOC*) c.1102C>T, p.(Gln368Ter) Variant in Different Populations in the gnomAD Database

This supplemental material has been provided by the authors to give readers additional information about their work.

**eTable.** List of Glaucoma End Point Definitions

| Phenotype                                                                   | ICD-10                             | ICD-9                  | ICD-8                       | Operation code             | ATC (drug purchases) |
|-----------------------------------------------------------------------------|------------------------------------|------------------------|-----------------------------|----------------------------|----------------------|
| Glaucoma (broad definition, the combination of all the subphenotypes below) | Any of the below                   | Any of the below       | Any of the below            |                            |                      |
| Glaucoma suspect                                                            | H400                               | 3650                   | 37597                       |                            |                      |
| Primary open-angle glaucoma, strict                                         | H40.1 (excluding 40.10 and H40.12) | 3651[A,C,E,X]          | 37510                       |                            |                      |
| Glaucoma, exfoliation                                                       | H40.10                             | 3651B                  | 37512                       |                            |                      |
| Normotensive glaucoma                                                       | H40.11                             | 3651C                  |                             |                            |                      |
| Primary angle-closure glaucoma                                              | H40.2                              | 3652                   | 37500, 37511                |                            |                      |
| Glaucoma secondary to eye trauma                                            | H40.3                              | 3656E                  |                             |                            |                      |
| Glaucoma secondary to eye inflammation                                      | H40.4                              | 3656F, 3656B           | 36401                       |                            |                      |
| Glaucoma secondary to other eye disorders                                   | H40.5                              | 3655, 3656A            |                             |                            |                      |
| Glaucoma secondary to drugs                                                 | H40.6                              | 3653A                  |                             |                            |                      |
| Other and unspecified glaucoma                                              | H40.[8-9]                          | 3656X, 3656C, 365[8-9] | 3752,3759 (excluding 37597) |                            |                      |
| Use of antiglaucoma preparations and miotics                                |                                    |                        |                             |                            | S01EA                |
| Glaucoma in diseases classified elsewhere                                   | H42                                | 3654A                  |                             |                            |                      |
| Glaucoma-related operations                                                 |                                    |                        |                             | CHD15, CHD50, CHD65, CFW99 |                      |

**eFigure.** Allele Frequencies of the Myocilin (*MYOC*) c.1102C>T, p.(Gln368Ter) Variant in Different Populations in the gnomAD Database

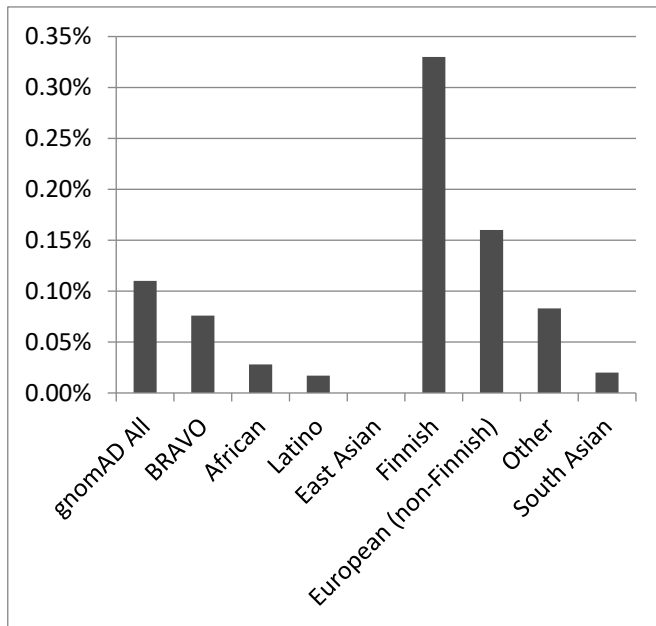

Supplement: jamaophthalmol-e211610-s001.pdf [file jamaophthalmol-e211610-s001.pdf]
