# Supplementary material
Source: PubMed Central journal article supplement (PMC8176385)
Supplement: jamaophthalmol-e211610-s002.pdf [file jamaophthalmol-e211610-s002.pdf]

\*Indicates required information. Only first name, last name, and suffix will appear in PubMed.

| <b>*Group Name(s): FinnGen Consortium</b> |                   |                              |                  |                                      |                                          |                                                         |                                                                                            |
|-------------------------------------------|-------------------|------------------------------|------------------|--------------------------------------|------------------------------------------|---------------------------------------------------------|--------------------------------------------------------------------------------------------|
| <b>*First Name and Middle Initial(s)</b>  | <b>*Last Name</b> | <b>*Suffix (eg, Jr, III)</b> | Academic Degrees | Institution                          | Location (city, state/province, country) | Role or Contribution, eg, chair, principal investigator | Group (if more than 1 Group listed in the byline) and/or Subgroup (eg, Steering Committee) |
| Howard                                    | Jacob             |                              |                  | Abbvie                               |                                          |                                                         | Pharma                                                                                     |
| Athena                                    | Matakidou         |                              |                  | Astra Zeneca                         |                                          |                                                         | Pharma                                                                                     |
| Heiko                                     | Runz              |                              |                  | Biogen                               |                                          |                                                         | Pharma                                                                                     |
| Sally                                     | John              |                              |                  | Biogen                               |                                          |                                                         | Pharma                                                                                     |
| Robert                                    | Plenge            |                              |                  | Celgene                              |                                          |                                                         | Pharma                                                                                     |
| Julie                                     | Hunkapiller       |                              |                  | Genentech                            |                                          |                                                         | Pharma                                                                                     |
| Meg                                       | Ehm               |                              |                  | GSK                                  |                                          |                                                         | Pharma                                                                                     |
| Dawn                                      | Waterworth        |                              |                  | GSK                                  |                                          |                                                         | Pharma                                                                                     |
| Caroline                                  | Fox               |                              |                  | Merck                                |                                          |                                                         | Pharma                                                                                     |
| Anders                                    | Malarstig         |                              |                  | Pfizer                               |                                          |                                                         | Pharma                                                                                     |
| Kathy                                     | Klinger           |                              |                  | Sanofi                               |                                          |                                                         | Pharma                                                                                     |
| Kathy                                     | Call              |                              |                  | Sanofi                               |                                          |                                                         | Pharma                                                                                     |
| Tomi                                      | Mäkelä            |                              |                  | University of Helsinki / FIMM        |                                          |                                                         | UH & Biobanks                                                                              |
| Jaakko                                    | Kaprio            |                              |                  | University of Helsinki / FIMM        |                                          |                                                         | UH & Biobanks                                                                              |
| Petri                                     | Virolainen        |                              |                  | Auria BB / Univ. of Turku /VSSHP     |                                          |                                                         | UH & Biobanks                                                                              |
| Kari                                      | Pulkki            |                              |                  | Auria BB / Univ. of Turku /VSSHP     |                                          |                                                         | UH & Biobanks                                                                              |
| Terhi                                     | Kilpi             |                              |                  | THL Biobank (BB) / THL               |                                          |                                                         | UH & Biobanks                                                                              |
| Markus                                    | Perola            |                              |                  | THL Biobank (BB) / THL               |                                          |                                                         | UH & Biobanks                                                                              |
| Jukka                                     | Partanen          |                              |                  | Finnish Red Cross Blood Service/FHRB |                                          |                                                         | UH & Biobanks                                                                              |
| Anne                                      | Pitkäranta        |                              |                  | HUS/Univ Hosp Districts              |                                          |                                                         | UH & Biobanks                                                                              |
| Riitta                                    | Kaarteenaho       |                              |                  | Borealis BB/Univ. of Oulu/PPSHP      |                                          |                                                         | UH & Biobanks                                                                              |
| Seppo                                     | Vainio            |                              |                  | Borealis BB/Univ. of Oulu/PPSHP      |                                          |                                                         | UH & Biobanks                                                                              |
| Kimmo                                     | Savinainen        |                              |                  | Tampere BB/Univ Tampere/PSHP         |                                          |                                                         | UH & Biobanks                                                                              |
| Veli-Matti                                | Kosma             |                              |                  | Eastern Finland BB/UEF/PSSHP         |                                          |                                                         | UH & Biobanks                                                                              |
| Urho                                      | Kujala            |                              |                  | Central Finland BB /UJy/KSSHP        |                                          |                                                         | UH & Biobanks                                                                              |
| Jeff                                      | Waring            |                              |                  | Abbvie                               |                                          |                                                         | Scientific Committee, Pharma                                                               |
| Bridget                                   | Riley-Gillis      |                              |                  | Abbvie                               |                                          |                                                         | Scientific Committee, Pharma                                                               |

## Supplemental Online Content: Nonauthor Collaborators

\*Indicates required information. Only first name, last name, and suffix will appear in PubMed.

| *First Name and Middle Initial(s) | *Last Name  | *Suffix (eg, Jr, III) | Academic Degrees | Institution  | Location (city, state/province, country) | Role or Contribution, eg, chair, principal investigator | Group (if more than 1 Group listed in the byline) and/or Subgroup (eg, Steering Committee) |
|-----------------------------------|-------------|-----------------------|------------------|--------------|------------------------------------------|---------------------------------------------------------|--------------------------------------------------------------------------------------------|
| Athena                            | Matakidou   |                       |                  | Astra Zeneca |                                          |                                                         | Scientific Committee, Pharma                                                               |
| Heiko                             | Runz        |                       |                  | Biogen       |                                          |                                                         | Scientific Committee, Pharma                                                               |
| Jimmy                             | Liu         |                       |                  | Biogen       |                                          |                                                         | Scientific Committee, Pharma                                                               |
| Shameek                           | Biswas      |                       |                  | Celgene      |                                          |                                                         | Scientific Committee, Pharma                                                               |
| Julie                             | Hunkapiller |                       |                  | Genentech    |                                          |                                                         | Scientific Committee, Pharma                                                               |
| Dawn                              | Waterworth  |                       |                  | GSK          |                                          |                                                         | Scientific Committee, Pharma                                                               |
| Meg                               | Ehm         |                       |                  | GSK          |                                          |                                                         | Scientific Committee, Pharma                                                               |
| Josh                              | Hoffman     |                       |                  | GSK          |                                          |                                                         | Scientific Committee, Pharma                                                               |
| Dorothee                          | Diogo       |                       |                  | Merck        |                                          |                                                         | Scientific Committee, Pharma                                                               |
| Caroline                          | Fox         |                       |                  | Merck        |                                          |                                                         | Scientific Committee, Pharma                                                               |
| Anders                            | Malarstig   |                       |                  | Pfizer       |                                          |                                                         | Scientific Committee, Pharma                                                               |
| Catherine                         | Marshall    |                       |                  | Pfizer       |                                          |                                                         | Scientific Committee, Pharma                                                               |
| Xinli                             | Hu          |                       |                  | Pfizer       |                                          |                                                         | Scientific Committee, Pharma                                                               |
| Kathy                             | Call        |                       |                  | Sanofi       |                                          |                                                         | Scientific Committee, Pharma                                                               |
| Kathy                             | Klinger     |                       |                  | Sanofi       |                                          |                                                         | Scientific Committee, Pharma                                                               |

## Supplemental Online Content: Nonauthor Collaborators

\*Indicates required information. Only first name, last name, and suffix will appear in PubMed.

| *First Name and Middle Initial(s) | *Last Name | *Suffix (eg, Jr, III) | Academic Degrees | Institution                          | Location (city, state/province, country) | Role or Contribution, eg, chair, principal investigator | Group (if more than 1 Group listed in the byline) and/or Subgroup (eg, Steering Committee) |
|-----------------------------------|------------|-----------------------|------------------|--------------------------------------|------------------------------------------|---------------------------------------------------------|--------------------------------------------------------------------------------------------|
| Samuli                            | Ripatti    |                       |                  | University of Helsinki / FIMM        |                                          |                                                         | Scientific Committee, UH & Biobanks                                                        |
| Johanna                           | Schleutker |                       |                  | Auria BB / Univ. of Turku /VSSHP     |                                          |                                                         | Scientific Committee, UH & Biobanks                                                        |
| Markus                            | Perola     |                       |                  | THL Biobank (BB) / THL               |                                          |                                                         | Scientific Committee, UH & Biobanks                                                        |
| Tiina                             | Wahlfors   |                       |                  | Finnish Red Cross Blood Service/FHRB |                                          |                                                         | Scientific Committee, UH & Biobanks                                                        |
| Olli                              | Carpen     |                       |                  | HUS/Univ Hosp Districts              |                                          |                                                         | Scientific Committee, UH & Biobanks                                                        |
| Johanna                           | Myllyharju |                       |                  | Borealis BB/Univ. of Oulu/PPSHP      |                                          |                                                         | Scientific Committee, UH & Biobanks                                                        |
| Johannes                          | Kettunen   |                       |                  | Borealis BB/Univ. of Oulu/PPSHP      |                                          |                                                         | Scientific Committee, UH & Biobanks                                                        |
| Reijo                             | Laaksonen  |                       |                  | Tampere BB/Univ Tampere/PSHP         |                                          |                                                         | Scientific Committee, UH & Biobanks                                                        |
| Arto                              | Mannermaa  |                       |                  | Eastern Finland BB/UEF/PSSHP         |                                          |                                                         | Scientific Committee, UH & Biobanks                                                        |
| Juha                              | Paloneva   |                       |                  | Central Finland BB /UJy/KSSHP        |                                          |                                                         | Scientific Committee, UH & Biobanks                                                        |
| Urho                              | Kujala     |                       |                  | Central Finland BB /UJy/KSSHP        |                                          |                                                         | Scientific Committee, UH & Biobanks                                                        |
| Hilkka                            | Soininen   |                       |                  | LEAD: Kuopio                         |                                          |                                                         | Neurology Group                                                                            |
| Valtteri                          | Julkunen   |                       |                  | Kuopio                               |                                          |                                                         | Neurology Group                                                                            |
| Anne                              | Remes      |                       |                  | Oulu                                 |                                          |                                                         | Neurology Group                                                                            |
| Reetta                            | Kälviäinen |                       |                  | Kuopio                               |                                          |                                                         | Neurology Group                                                                            |
| Mikko                             | Hiltunen   |                       |                  | Kuopio                               |                                          |                                                         | Neurology Group                                                                            |
| Jukka                             | Peltola    |                       |                  | Tampere                              |                                          |                                                         | Neurology Group                                                                            |
| Pentti                            | Tienari    |                       |                  | Helsinki                             |                                          |                                                         | Neurology Group                                                                            |
| Juha                              | Rinne      |                       |                  | Turku                                |                                          |                                                         | Neurology Group                                                                            |
| Adam                              | Ziemann    |                       |                  | AbbVie                               |                                          |                                                         | Neurology Group                                                                            |

## Supplemental Online Content: Nonauthor Collaborators

\*Indicates required information. Only first name, last name, and suffix will appear in PubMed.

| *First Name and Middle Initial(s) | *Last Name    | *Suffix (eg, Jr, III) | Academic Degrees | Institution   | Location (city, state/province, country) | Role or Contribution, eg, chair, principal investigator | Group (if more than 1 Group listed in the byline) and/or Subgroup (eg, Steering Committee) |
|-----------------------------------|---------------|-----------------------|------------------|---------------|------------------------------------------|---------------------------------------------------------|--------------------------------------------------------------------------------------------|
| Jeffrey                           | Waring        |                       |                  | AbbVie        |                                          |                                                         | Neurology Group                                                                            |
| Sahar                             | Esmaeeli      |                       |                  | AbbVie        |                                          |                                                         | Neurology Group                                                                            |
| Nizar                             | Smaoui        |                       |                  | AbbVie        |                                          |                                                         | Neurology Group                                                                            |
| Anne                              | Lehtonen      |                       |                  | AbbVie        |                                          |                                                         | Neurology Group                                                                            |
| Susan                             | Eaton         |                       |                  | Biogen        |                                          |                                                         | Neurology Group                                                                            |
| Heiko                             | Runz          |                       |                  | Biogen        |                                          |                                                         | Neurology Group                                                                            |
| Sanni                             | Lahdenperä    |                       |                  | Biogen        |                                          |                                                         | Neurology Group                                                                            |
| Janet                             | van Adelsberg |                       |                  | Celgene       |                                          |                                                         | Neurology Group                                                                            |
| Shameek                           | Biswas        |                       |                  | Celgene       |                                          |                                                         | Neurology Group                                                                            |
| John                              | Michon        |                       |                  | Genentech     |                                          |                                                         | Neurology Group                                                                            |
| Geoff                             | Kerchner      |                       |                  | Genentech     |                                          |                                                         | Neurology Group                                                                            |
| Julie                             | Hunkapiller   |                       |                  | Genentech     |                                          |                                                         | Neurology Group                                                                            |
| Natalie                           | Bowers        |                       |                  | Genentech     |                                          |                                                         | Neurology Group                                                                            |
| Edmond                            | Teng          |                       |                  | Genentech     |                                          |                                                         | Neurology Group                                                                            |
| John                              | Eicher        |                       |                  | Merck         |                                          |                                                         | Neurology Group                                                                            |
| Vinay                             | Mehta         |                       |                  | Merck         |                                          |                                                         | Neurology Group                                                                            |
| Padhraig                          | Gormley       |                       |                  | Merck         |                                          |                                                         | Neurology Group                                                                            |
| Kari                              | Linden        |                       |                  | Pfizer        |                                          |                                                         | Neurology Group                                                                            |
| Christopher                       | Whelan        |                       |                  | Pfizer        |                                          |                                                         | Neurology Group                                                                            |
| Fanli                             | Xu            |                       |                  | GSK           |                                          |                                                         | Neurology Group                                                                            |
| David                             | Pulford       |                       |                  | GSK           |                                          |                                                         | Neurology Group                                                                            |
| Martti                            | Färkkilä      |                       |                  | LEAD:Helsinki |                                          |                                                         | Gastroenterology Group                                                                     |
| Sampsa                            | Pikkarainen   |                       |                  | HUS           |                                          |                                                         | Gastroenterology Group                                                                     |
| Airi                              | Jussila       |                       |                  | Tampere       |                                          |                                                         | Gastroenterology Group                                                                     |
| Timo                              | Blomster      |                       |                  | Oulu          |                                          |                                                         | Gastroenterology Group                                                                     |
| Mikko                             | Kiviniemi     |                       |                  | Kuopio        |                                          |                                                         | Gastroenterology Group                                                                     |
| Markku                            | Voutilainen   |                       |                  | Turku         |                                          |                                                         | Gastroenterology Group                                                                     |
| Bob                               | Georgantas    |                       |                  | AbbVie        |                                          |                                                         | Gastroenterology Group                                                                     |
| Graham                            | Heap          |                       |                  | AbbVie        |                                          |                                                         | Gastroenterology Group                                                                     |
| Jeffrey                           | Waring        |                       |                  | AbbVie        |                                          |                                                         | Gastroenterology Group                                                                     |
| Nizar                             | Smaoui        |                       |                  | AbbVie        |                                          |                                                         | Gastroenterology Group                                                                     |

## Supplemental Online Content: Nonauthor Collaborators

\*Indicates required information. Only first name, last name, and suffix will appear in PubMed.

| *First Name and Middle Initial(s) | *Last Name         | *Suffix (eg, Jr, III) | Academic Degrees | Institution   | Location (city, state/province, country) | Role or Contribution, eg, chair, principal investigator | Group (if more than 1 Group listed in the byline) and/or Subgroup (eg, Steering Committee) |
|-----------------------------------|--------------------|-----------------------|------------------|---------------|------------------------------------------|---------------------------------------------------------|--------------------------------------------------------------------------------------------|
| Fedik                             | Rahimov            |                       |                  | AbbVie        |                                          |                                                         | Gastroenterology Group                                                                     |
| Anne                              | Lehtonen           |                       |                  | AbbVie        |                                          |                                                         | Gastroenterology Group                                                                     |
| Keith                             | Usiskin            |                       |                  | Celgene       |                                          |                                                         | Gastroenterology Group                                                                     |
| Tim                               | Lu                 |                       |                  |               |                                          |                                                         | Gastroenterology Group                                                                     |
| Natalie                           | Bowers             |                       |                  | Genentech     |                                          |                                                         | Gastroenterology Group                                                                     |
| Danny                             | Oh                 |                       |                  | Genentech     |                                          |                                                         | Gastroenterology Group                                                                     |
| John                              | Michon             |                       |                  | Genentech     |                                          |                                                         | Gastroenterology Group                                                                     |
| Vinay                             | Mehta              |                       |                  | Merck         |                                          |                                                         | Gastroenterology Group                                                                     |
| Dermot                            | Reilly             |                       |                  | Merck         |                                          |                                                         | Gastroenterology Group                                                                     |
| Kirsi                             | Kalpala            |                       |                  | Pfizer        |                                          |                                                         | Gastroenterology Group                                                                     |
| Melissa                           | Miller             |                       |                  | Pfizer        |                                          |                                                         | Gastroenterology Group                                                                     |
| Xinli                             | Hu                 |                       |                  |               |                                          |                                                         | Gastroenterology Group                                                                     |
| Linda                             | McCarthy           |                       |                  | GSK           |                                          |                                                         | Gastroenterology Group                                                                     |
| Kari                              | Eklund             |                       |                  | LEAD:Helsinki |                                          |                                                         | Rheumatology Group                                                                         |
| Antti                             | Palomäki           |                       |                  | Turku         |                                          |                                                         | Rheumatology Group                                                                         |
| Pia                               | Isomaki            |                       |                  | Tampere       |                                          |                                                         | Rheumatology Group                                                                         |
| Laura                             | Pirilä             |                       |                  | Turku         |                                          |                                                         | Rheumatology Group                                                                         |
| Oili                              | Kaipainen-Seppänen |                       |                  | Kuopio        |                                          |                                                         | Rheumatology Group                                                                         |
| Johanna                           | Huhtakangas        |                       |                  | Oulu          |                                          |                                                         | Rheumatology Group                                                                         |
| Bob                               | Georgantas         |                       |                  | AbbVie        |                                          |                                                         | Rheumatology Group                                                                         |
| Jeffrey                           | Waring             |                       |                  | AbbVie        |                                          |                                                         | Rheumatology Group                                                                         |
| Fedik                             | Rahimov            |                       |                  | AbbVie        |                                          |                                                         | Rheumatology Group                                                                         |
| Apinya                            | Lertratanakul      |                       |                  | AbbVie        |                                          |                                                         | Rheumatology Group                                                                         |
| Nizar                             | Smaoui             |                       |                  | AbbVie        |                                          |                                                         | Rheumatology Group                                                                         |
| Anne                              | Lehtonen           |                       |                  | AbbVie        |                                          |                                                         | Rheumatology Group                                                                         |
| David                             | Close              |                       |                  | AstraZeneca   |                                          |                                                         | Rheumatology Group                                                                         |
| Marla                             | Hochfeld           |                       |                  | Celgene       |                                          |                                                         | Rheumatology Group                                                                         |
| Natalie                           | Bowers             |                       |                  | Genentech     |                                          |                                                         | Rheumatology Group                                                                         |
| John                              | Michon             |                       |                  | Genentech     |                                          |                                                         | Rheumatology Group                                                                         |
| Dorothee                          | Diogo              |                       |                  | Merck         |                                          |                                                         | Rheumatology Group                                                                         |
| Vinay                             | Mehta              |                       |                  | Merck         |                                          |                                                         | Rheumatology Group                                                                         |

## Supplemental Online Content: Nonauthor Collaborators

\*Indicates required information. Only first name, last name, and suffix will appear in PubMed.

| *First Name and Middle Initial(s) | *Last Name       | *Suffix (eg, Jr, III) | Academic Degrees | Institution                   | Location (city, state/province, country) | Role or Contribution, eg, chair, principal investigator | Group (if more than 1 Group listed in the byline) and/or Subgroup (eg, Steering Committee) |
|-----------------------------------|------------------|-----------------------|------------------|-------------------------------|------------------------------------------|---------------------------------------------------------|--------------------------------------------------------------------------------------------|
| Kirsi                             | Kalpala          |                       |                  | Pfizer                        |                                          |                                                         | Rheumatology Group                                                                         |
| Nan                               | Bing             |                       |                  | Pfizer                        |                                          |                                                         | Rheumatology Group                                                                         |
| Xinli                             | Hu               |                       |                  |                               |                                          |                                                         | Rheumatology Group                                                                         |
| Jorge                             | Esparza Gordillo |                       |                  | GSK                           |                                          |                                                         | Rheumatology Group                                                                         |
| Nina                              | Mars             |                       |                  | University of Helsinki / FIMM |                                          |                                                         | Rheumatology Group                                                                         |
| Tarja                             | Laitinen         |                       |                  | LEAD:Tampere                  |                                          |                                                         | Pulmonology Group                                                                          |
| Margit                            | Pelkonen         |                       |                  | Kuopio                        |                                          |                                                         | Pulmonology Group                                                                          |
| Paula                             | Kauppi           |                       |                  | Helsinki                      |                                          |                                                         | Pulmonology Group                                                                          |
| Hannu                             | Kankaanranta     |                       |                  | Tampere                       |                                          |                                                         | Pulmonology Group                                                                          |
| Terttu                            | Harju            |                       |                  | Oulu                          |                                          |                                                         | Pulmonology Group                                                                          |
| Nizar                             | Smaoui           |                       |                  | AbbVie                        |                                          |                                                         | Pulmonology Group                                                                          |
| David                             | Close            |                       |                  | AstraZeneca                   |                                          |                                                         | Pulmonology Group                                                                          |
| Steven                            | Greenberg        |                       |                  | Celgene                       |                                          |                                                         | Pulmonology Group                                                                          |
| Hubert                            | Chen             |                       |                  | Genentech                     |                                          |                                                         | Pulmonology Group                                                                          |
| Natalie                           | Bowers           |                       |                  | Genentech                     |                                          |                                                         | Pulmonology Group                                                                          |
| John                              | Michon           |                       |                  | Genentech                     |                                          |                                                         | Pulmonology Group                                                                          |
| Vinay                             | Mehta            |                       |                  | Merck                         |                                          |                                                         | Pulmonology Group                                                                          |
| Jo                                | Betts            |                       |                  | GSK                           |                                          |                                                         | Pulmonology Group                                                                          |
| Soumitra                          | Ghosh            |                       |                  | GSK                           |                                          |                                                         | Pulmonology Group                                                                          |
| Veikko                            | Salomaa          |                       |                  | Lead: THL                     |                                          |                                                         | Cardiometabolic Diseases Group                                                             |
| Teemu                             | Niiranen         |                       |                  | THL                           |                                          |                                                         | Cardiometabolic Diseases Group                                                             |
| Markus                            | Juonala          |                       |                  | Turku                         |                                          |                                                         | Cardiometabolic Diseases Group                                                             |
| Kaj                               | Metsärinne       |                       |                  | Turku                         |                                          |                                                         | Cardiometabolic Diseases Group                                                             |
| Mika                              | Kähönen          |                       |                  | Tampere                       |                                          |                                                         | Cardiometabolic Diseases Group                                                             |

## Supplemental Online Content: Nonauthor Collaborators

\*Indicates required information. Only first name, last name, and suffix will appear in PubMed.

| *First Name and Middle Initial(s) | *Last Name  | *Suffix (eg, Jr, III) | Academic Degrees | Institution                 | Location (city, state/province, country) | Role or Contribution, eg, chair, principal investigator | Group (if more than 1 Group listed in the byline) and/or Subgroup (eg, Steering Committee) |
|-----------------------------------|-------------|-----------------------|------------------|-----------------------------|------------------------------------------|---------------------------------------------------------|--------------------------------------------------------------------------------------------|
| Juhani                            | Junttila    |                       |                  | Oulu                        |                                          |                                                         | Cardiometabolic Diseases Group                                                             |
| Markku                            | Laakso      |                       |                  | Kuopio                      |                                          |                                                         | Cardiometabolic Diseases Group                                                             |
| Jussi                             | Pihlajamäki |                       |                  | Kuopio                      |                                          |                                                         | Cardiometabolic Diseases Group                                                             |
| Juha                              | Sinisalo    |                       |                  | Helsinki                    |                                          |                                                         | Cardiometabolic Diseases Group                                                             |
| Marja-Riitta                      | Taskinen    |                       |                  | Helsinki                    |                                          |                                                         | Cardiometabolic Diseases Group                                                             |
| Tiinamaija                        | Tuomi       |                       |                  | Helsinki                    |                                          |                                                         | Cardiometabolic Diseases Group                                                             |
| Jari                              | Laukkanen   |                       |                  | Keski-Suomen Keskussairaala |                                          |                                                         | Cardiometabolic Diseases Group                                                             |
| Ben                               | Challis     |                       |                  | AstraZeneca                 |                                          |                                                         | Cardiometabolic Diseases Group                                                             |
| Keith                             | Usiskin     |                       |                  | Celgene                     |                                          |                                                         | Cardiometabolic Diseases Group                                                             |
| Andrew                            | Peterson    |                       |                  | Genentech                   |                                          |                                                         | Cardiometabolic Diseases Group                                                             |
| Julie                             | Hunkapiller |                       |                  | Genentech                   |                                          |                                                         | Cardiometabolic Diseases Group                                                             |
| Natalie                           | Bowers      |                       |                  | Genentech                   |                                          |                                                         | Cardiometabolic Diseases Group                                                             |
| John                              | Michon      |                       |                  | Genentech                   |                                          |                                                         | Cardiometabolic Diseases Group                                                             |
| Dorothee                          | Diogo       |                       |                  | Merck                       |                                          |                                                         | Cardiometabolic Diseases Group                                                             |
| Dermot                            | Reilly      |                       |                  | Merck                       |                                          |                                                         | Cardiometabolic Diseases Group                                                             |

## Supplemental Online Content: Nonauthor Collaborators

\*Indicates required information. Only first name, last name, and suffix will appear in PubMed.

| *First Name and Middle Initial(s) | *Last Name   | *Suffix (eg, Jr, III) | Academic Degrees | Institution    | Location (city, state/province, country) | Role or Contribution, eg, chair, principal investigator | Group (if more than 1 Group listed in the byline) and/or Subgroup (eg, Steering Committee) |
|-----------------------------------|--------------|-----------------------|------------------|----------------|------------------------------------------|---------------------------------------------------------|--------------------------------------------------------------------------------------------|
| Audrey                            | Chu          |                       |                  | Merck          |                                          |                                                         | Cardiometabolic Diseases Group                                                             |
| Vinay                             | Mehta        |                       |                  | Merck          |                                          |                                                         | Cardiometabolic Diseases Group                                                             |
| Jaakko                            | Parkkinen    |                       |                  | Pfizer         |                                          |                                                         | Cardiometabolic Diseases Group                                                             |
| Melissa                           | Miller       |                       |                  | Pfizer         |                                          |                                                         | Cardiometabolic Diseases Group                                                             |
| Anthony                           | Muslin       |                       |                  | Sanofi         |                                          |                                                         | Cardiometabolic Diseases Group                                                             |
| Dawn                              | Waterworth   |                       |                  | GSK            |                                          |                                                         | Cardiometabolic Diseases Group                                                             |
| Heikki                            | Joensuu      |                       |                  | Lead: Helsinki |                                          |                                                         | Oncology Group                                                                             |
| Tuomo                             | Meretoja     |                       |                  | Helsinki       |                                          |                                                         | Oncology Group                                                                             |
| Olli                              | Carpen       |                       |                  | Helsinki       |                                          |                                                         | Oncology Group                                                                             |
| Lauri                             | Aaltonen     |                       |                  | Helsinki       |                                          |                                                         | Oncology Group                                                                             |
| Annika                            | Auranen      |                       |                  | Tampere        |                                          |                                                         | Oncology Group                                                                             |
| Peeter                            | Karihtala    |                       |                  | Oulu           |                                          |                                                         | Oncology Group                                                                             |
| Saila                             | Kauppila     |                       |                  | Oulu           |                                          |                                                         | Oncology Group                                                                             |
| Päivi                             | Auvinen      |                       |                  | Kuopio         |                                          |                                                         | Oncology Group                                                                             |
| Klaus                             | Elenius      |                       |                  | Turku          |                                          |                                                         | Oncology Group                                                                             |
| Relja                             | Popovic      |                       |                  | AbbVie         |                                          |                                                         | Oncology Group                                                                             |
| Jeffrey                           | Waring       |                       |                  | AbbVie         |                                          |                                                         | Oncology Group                                                                             |
| Bridget                           | Riley-Gillis |                       |                  | AbbVie         |                                          |                                                         | Oncology Group                                                                             |
| Anne                              | Lehtonen     |                       |                  | AbbVie         |                                          |                                                         | Oncology Group                                                                             |
| Athena                            | Matakidou    |                       |                  | AstraZeneca    |                                          |                                                         | Oncology Group                                                                             |
| Jennifer                          | Schutzman    |                       |                  | Genentech      |                                          |                                                         | Oncology Group                                                                             |
| Julie                             | Hunkapiller  |                       |                  | Genentech      |                                          |                                                         | Oncology Group                                                                             |
| Natalie                           | Bowers       |                       |                  | Genentech      |                                          |                                                         | Oncology Group                                                                             |
| John                              | Michon       |                       |                  | Genentech      |                                          |                                                         | Oncology Group                                                                             |
| Vinay                             | Mehta        |                       |                  | Merck          |                                          |                                                         | Oncology Group                                                                             |



## Supplemental Online Content: Nonauthor Collaborators

\*Indicates required information. Only first name, last name, and suffix will appear in PubMed.

| *First Name and Middle Initial(s) | *Last Name        | *Suffix (eg, Jr, III) | Academic Degrees | Institution | Location (city, state/province, country) | Role or Contribution, eg, chair, principal investigator | Group (if more than 1 Group listed in the byline) and/or Subgroup (eg, Steering Committee) |
|-----------------------------------|-------------------|-----------------------|------------------|-------------|------------------------------------------|---------------------------------------------------------|--------------------------------------------------------------------------------------------|
| Andrey                            | Loboda            |                       |                  | Merck       |                                          |                                                         | Oncology Group                                                                             |
| Aparna                            | Chhibber          |                       |                  | Merck       |                                          |                                                         | Oncology Group                                                                             |
| Heli                              | Lehtonen          |                       |                  | Pfizer      |                                          |                                                         | Oncology Group                                                                             |
| Stefan                            | McDonough         |                       |                  | Pfizer      |                                          |                                                         | Oncology Group                                                                             |
| Marika                            | Crohns            |                       |                  | Sanofi      |                                          |                                                         | Oncology Group                                                                             |
| Diptee                            | Kulkarni          |                       |                  | GSK         |                                          |                                                         | Oncology Group                                                                             |
| Terhi                             | Ollila            |                       |                  | HUS         |                                          |                                                         | Ophthalmology Group                                                                        |
| Sanna                             | Seitsonen         |                       |                  | HUS         |                                          |                                                         | Ophthalmology Group                                                                        |
| Vesa                              | Aaltonen          |                       |                  | Turku       |                                          |                                                         | Ophthalmology Group                                                                        |
| Hannele                           | Uusitalo-Järvinen |                       |                  | PSHP        |                                          |                                                         | Ophthalmology Group                                                                        |
| Marja                             | Luodonpää         |                       |                  | Oulu        |                                          |                                                         | Ophthalmology Group                                                                        |
| Nina                              | Hautala           |                       |                  | Oulu        |                                          |                                                         | Ophthalmology Group                                                                        |
| Heiko                             | Runz              |                       |                  | Biogen      |                                          |                                                         | Ophthalmology Group                                                                        |
| Erich                             | Strauss           |                       |                  | Genentech   |                                          |                                                         | Ophthalmology Group                                                                        |
| Natalie                           | Bowers            |                       |                  | Genentech   |                                          |                                                         | Ophthalmology Group                                                                        |
| Hao                               | Chen              |                       |                  | Genentech   |                                          |                                                         | Ophthalmology Group                                                                        |
| John                              | Michon            |                       |                  | Genentech   |                                          |                                                         | Ophthalmology Group                                                                        |
| Anna                              | Podgornaia        |                       |                  | Merck       |                                          |                                                         | Ophthalmology Group                                                                        |
| Vinay                             | Mehta             |                       |                  | Merck       |                                          |                                                         | Ophthalmology Group                                                                        |
| Dorothee                          | Diogo             |                       |                  | Merck       |                                          |                                                         | Ophthalmology Group                                                                        |
| Joshua                            | Hoffman           |                       |                  | GSK         |                                          |                                                         | Ophthalmology Group                                                                        |
| Kaisa                             | Tasanen           |                       |                  | Oulu        |                                          |                                                         | Dermatology Group                                                                          |
| Laura                             | Huilaja           |                       |                  | Oulu        |                                          |                                                         | Dermatology Group                                                                          |
| Katariina                         | Hannula-Jouppi    |                       |                  | HUS         |                                          |                                                         | Dermatology Group                                                                          |
| Teea                              | Salmi             |                       |                  | Tampere     |                                          |                                                         | Dermatology Group                                                                          |
| Sirkku                            | Peltonen          |                       |                  | Turku       |                                          |                                                         | Dermatology Group                                                                          |
| Leena                             | Koulu             |                       |                  | Turku       |                                          |                                                         | Dermatology Group                                                                          |
| Ilkka                             | Harvima           |                       |                  | Kuopio      |                                          |                                                         | Dermatology Group                                                                          |
| Kirsi                             | Kalpala           |                       |                  | Pfizer      |                                          |                                                         | Dermatology Group                                                                          |
| Ying                              | Wu                |                       |                  | Pfizer      |                                          |                                                         | Dermatology Group                                                                          |
| David                             | Choy              |                       |                  | Genentech   |                                          |                                                         | Dermatology Group                                                                          |

## Supplemental Online Content: Nonauthor Collaborators

\*Indicates required information. Only first name, last name, and suffix will appear in PubMed.

| *First Name and Middle Initial(s) | *Last Name   | *Suffix (eg, Jr, III) | Academic Degrees | Institution                   | Location (city, state/province, country) | Role or Contribution, eg, chair, principal investigator | Group (if more than 1 Group listed in the byline) and/or Subgroup (eg, Steering Committee) |
|-----------------------------------|--------------|-----------------------|------------------|-------------------------------|------------------------------------------|---------------------------------------------------------|--------------------------------------------------------------------------------------------|
| John                              | Michon       |                       |                  | Genentech                     |                                          |                                                         | Dermatology Group                                                                          |
| Nizar                             | Smaoui       |                       |                  | AbbVie                        |                                          |                                                         | Dermatology Group                                                                          |
| Fedik                             | Rahimov      |                       |                  | AbbVie                        |                                          |                                                         | Dermatology Group                                                                          |
| Anne                              | Lehtonen     |                       |                  | AbbVie                        |                                          |                                                         | Dermatology Group                                                                          |
| Dawn                              | Waterworth   |                       |                  | GSK                           |                                          |                                                         | Dermatology Group                                                                          |
| Anu                               | Jalanko      |                       |                  | University of Helsinki / FIMM |                                          |                                                         | FinnGen Administration Team                                                                |
| Risto                             | Kajanne      |                       |                  | University of Helsinki / FIMM |                                          |                                                         | FinnGen Administration Team                                                                |
| Ulrike                            | Lyhs         |                       |                  | University of Helsinki / FIMM |                                          |                                                         | FinnGen Administration Team                                                                |
| Mari                              | Kaunisto     |                       |                  | University of Helsinki / FIMM |                                          |                                                         | FinnGen Communication                                                                      |
| Justin                            | Wade Davis   |                       |                  | Abbvie                        |                                          |                                                         | FinnGen Analysis Team                                                                      |
| Bridget                           | Riley-Gillis |                       |                  | Abbvie                        |                                          |                                                         | FinnGen Analysis Team                                                                      |
| Danjuma                           | Quarless     |                       |                  | Abbvie                        |                                          |                                                         | FinnGen Analysis Team                                                                      |
| Slavé                             | Petrovski    |                       |                  | Astra Zeneca                  |                                          |                                                         | FinnGen Analysis Team                                                                      |
| Jimmy                             | Liu          |                       |                  | Biogen                        |                                          |                                                         | FinnGen Analysis Team                                                                      |
| Chia-Yen                          | Chen         |                       |                  | Biogen                        |                                          |                                                         | FinnGen Analysis Team                                                                      |
| Paola                             | Bronson      |                       |                  | Biogen                        |                                          |                                                         | FinnGen Analysis Team                                                                      |
| Robert                            | Yang         |                       |                  | Celgene                       |                                          |                                                         | FinnGen Analysis Team                                                                      |
| Joseph                            | Maranville   |                       |                  | Celgene                       |                                          |                                                         | FinnGen Analysis Team                                                                      |
| Shameek                           | Biswas       |                       |                  | Celgene                       |                                          |                                                         | FinnGen Analysis Team                                                                      |
| Diana                             | Chang        |                       |                  | Genentech                     |                                          |                                                         | FinnGen Analysis Team                                                                      |
| Julie                             | Hunkapiller  |                       |                  | Genentech                     |                                          |                                                         | FinnGen Analysis Team                                                                      |
| Tushar                            | Bhangale     |                       |                  | Genentech                     |                                          |                                                         | FinnGen Analysis Team                                                                      |
| Natalie                           | Bowers       |                       |                  | Genentech                     |                                          |                                                         | FinnGen Analysis Team                                                                      |
| Dorothee                          | Diogo        |                       |                  | Merck                         |                                          |                                                         | FinnGen Analysis Team                                                                      |
| Emily                             | Holzinger    |                       |                  | Merck                         |                                          |                                                         | FinnGen Analysis Team                                                                      |
| Padhraig                          | Gormley      |                       |                  | Merck                         |                                          |                                                         | FinnGen Analysis Team                                                                      |
| Xulong                            | Wang         |                       |                  | Merck                         |                                          |                                                         | FinnGen Analysis Team                                                                      |

## Supplemental Online Content: Nonauthor Collaborators

\*Indicates required information. Only first name, last name, and suffix will appear in PubMed.

| *First Name and Middle Initial(s) | *Last Name           | *Suffix (eg, Jr, III) | Academic Degrees | Institution                                    | Location (city, state/province, country) | Role or Contribution, eg, chair, principal investigator | Group (if more than 1 Group listed in the byline) and/or Subgroup (eg, Steering Committee) |
|-----------------------------------|----------------------|-----------------------|------------------|------------------------------------------------|------------------------------------------|---------------------------------------------------------|--------------------------------------------------------------------------------------------|
| Xing                              | Chen                 |                       |                  | Pfizer                                         |                                          |                                                         | FinnGen Analysis Team                                                                      |
| Åsa                               | Hedman               |                       |                  | Pfizer                                         |                                          |                                                         | FinnGen Analysis Team                                                                      |
| Joshua                            | Hoffman              |                       |                  | GSK                                            |                                          |                                                         | FinnGen Analysis Team                                                                      |
| Clarence                          | Wang                 |                       |                  | Sanofi                                         |                                          |                                                         | FinnGen Analysis Team                                                                      |
| Ethan                             | Xu                   |                       |                  | Sanofi                                         |                                          |                                                         | FinnGen Analysis Team                                                                      |
| Franck                            | Auge                 |                       |                  | Sanofi                                         |                                          |                                                         | FinnGen Analysis Team                                                                      |
| Clement                           | Chatelain            |                       |                  | Sanofi                                         |                                          |                                                         | FinnGen Analysis Team                                                                      |
| Mitja                             | Kurki                |                       |                  | University of Helsinki / FIMM/ Broad Institute |                                          |                                                         | FinnGen Analysis Team                                                                      |
| Samuli                            | Ripatti              |                       |                  | University of Helsinki / FIMM                  |                                          |                                                         | FinnGen Analysis Team                                                                      |
| Juha                              | Karjalainen          |                       |                  | University of Helsinki / FIMM/ Broad Institute |                                          |                                                         | FinnGen Analysis Team                                                                      |
| Anu                               | Jalanko              |                       |                  | University of Helsinki / FIMM                  |                                          |                                                         | FinnGen Analysis Team                                                                      |
| Kimmo                             | Palin                |                       |                  | University of Helsinki                         |                                          |                                                         | FinnGen Analysis Team                                                                      |
| Priit                             | Palta                |                       |                  | University of Helsinki / FIMM                  |                                          |                                                         | FinnGen Analysis Team                                                                      |
| Pietro                            | della Briotta Parolo |                       |                  | University of Helsinki / FIMM                  |                                          |                                                         | FinnGen Analysis Team                                                                      |
| Wei                               | Zhou                 |                       |                  | Broad Institute                                |                                          |                                                         | FinnGen Analysis Team                                                                      |
| Manuel                            | Rivas                |                       |                  | University of Stanford                         |                                          |                                                         | FinnGen Analysis Team                                                                      |
| Jarmo                             | Harju                |                       |                  | University of Helsinki / FIMM                  |                                          |                                                         | FinnGen Analysis Team                                                                      |
| Arto                              | Lehisto              |                       |                  | University of Helsinki / FIMM                  |                                          |                                                         | FinnGen Analysis Team                                                                      |
| Andrea                            | Ganna                |                       |                  | University of Helsinki / FIMM                  |                                          |                                                         | FinnGen Analysis Team                                                                      |
| Vincent                           | Llorens              |                       |                  | University of Helsinki / FIMM                  |                                          |                                                         | FinnGen Analysis Team                                                                      |
| Antti                             | Karlsson             |                       |                  | Auria BB / Univ. of Turku /VSSHP               |                                          |                                                         | FinnGen Analysis Team                                                                      |
| Kati                              | Kristiansson         |                       |                  | THL BB / THL                                   |                                          |                                                         | FinnGen Analysis Team                                                                      |
| Mikko                             | Arvas                |                       |                  | Finnish Red Cross Blood Service BB /FHRB       |                                          |                                                         | FinnGen Analysis Team                                                                      |
| Kati                              | Hyvärinen            |                       |                  | Finnish Red Cross Blood Service BB /FHRB       |                                          |                                                         | FinnGen Analysis Team                                                                      |
| Jarmo                             | Ritari               |                       |                  | Finnish Red Cross Blood Service BB /FHRB       |                                          |                                                         | FinnGen Analysis Team                                                                      |
| Tiina                             | Wahlfors             |                       |                  | Finnish Red Cross Blood Service BB /FHRB       |                                          |                                                         | FinnGen Analysis Team                                                                      |
| Miika                             | Koskinen             |                       |                  | Helsinki BB/HUS/Univ Hosp Districts            |                                          |                                                         | FinnGen Analysis Team                                                                      |
| Olli                              | Carpen               |                       |                  | Helsinki BB/HUS/Univ Hosp Districts            |                                          |                                                         | FinnGen Analysis Team                                                                      |
| Johannes                          | Kettunen             |                       |                  | Borealis BB/Univ. of Oulu/PPSHP                |                                          |                                                         | FinnGen Analysis Team                                                                      |
| Katri                             | Pylkäs               |                       |                  | Borealis BB/Univ. of Oulu/PPSHP                |                                          |                                                         | FinnGen Analysis Team                                                                      |
| Marita                            | Kalaoja              |                       |                  | Borealis BB/Univ. of Oulu/PPSHP                |                                          |                                                         | FinnGen Analysis Team                                                                      |

## Supplemental Online Content: Nonauthor Collaborators

\*Indicates required information. Only first name, last name, and suffix will appear in PubMed.

| *First Name and Middle Initial(s) | *Last Name   | *Suffix (eg, Jr, III) | Academic Degrees | Institution                         | Location (city, state/province, country) | Role or Contribution, eg, chair, principal investigator | Group (if more than 1 Group listed in the byline) and/or Subgroup (eg, Steering Committee) |
|-----------------------------------|--------------|-----------------------|------------------|-------------------------------------|------------------------------------------|---------------------------------------------------------|--------------------------------------------------------------------------------------------|
| Minna                             | Karjalainen  |                       |                  | Borealis BB/Univ. of Oulu/PPSHP     |                                          |                                                         | FinnGen Analysis Team                                                                      |
| Tuomo                             | Mantere      |                       |                  | Borealis BB/Univ. of Oulu/PPSHP     |                                          |                                                         | FinnGen Analysis Team                                                                      |
| Eeva                              | Kangasniemi  |                       |                  | Tampere BB/Univ Tampere/PSHP        |                                          |                                                         | FinnGen Analysis Team                                                                      |
| Sami                              | Heikkinen    |                       |                  | Eastern Finland BB/UEF/PSSHP        |                                          |                                                         | FinnGen Analysis Team                                                                      |
| Arto                              | Mannermaa    |                       |                  | Eastern Finland BB/UEF/PSSHP        |                                          |                                                         | FinnGen Analysis Team                                                                      |
| Eija                              | Laakkonen    |                       |                  | Central Finland BB /UJy/KSSHP       |                                          |                                                         | FinnGen Analysis Team                                                                      |
| Juha                              | Kononen      |                       |                  | Central Finland BB /UJy/KSSHP       |                                          |                                                         | FinnGen Analysis Team                                                                      |
| Anu                               | Loukola      |                       |                  | Helsinki BB/HUS/Univ Hosp Districts |                                          |                                                         | FinnGen Sample Collection Coordination                                                     |
| Päivi                             | Laiho        |                       |                  | THL BB / THL                        |                                          |                                                         | FinnGen Sample Logistics                                                                   |
| Tuuli                             | Sistonen     |                       |                  | THL BB / THL                        |                                          |                                                         | FinnGen Sample Logistics                                                                   |
| Essi                              | Kaiharju     |                       |                  | THL BB / THL                        |                                          |                                                         | FinnGen Sample Logistics                                                                   |
| Markku                            | Laukkanen    |                       |                  | THL BB / THL                        |                                          |                                                         | FinnGen Sample Logistics                                                                   |
| Elina                             | Järvensivu   |                       |                  | THL BB / THL                        |                                          |                                                         | FinnGen Sample Logistics                                                                   |
| Sini                              | Lähteenmäki  |                       |                  | THL BB / THL                        |                                          |                                                         | FinnGen Sample Logistics                                                                   |
| Lotta                             | Männikkö     |                       |                  | THL BB / THL                        |                                          |                                                         | FinnGen Sample Logistics                                                                   |
| Regis                             | Wong         |                       |                  | THL BB / THL                        |                                          |                                                         | FinnGen Sample Logistics                                                                   |
| Hannele                           | Mattsson     |                       |                  | THL BB / THL                        |                                          |                                                         | FinnGen Registry Data Operations                                                           |
| Kati                              | Kristiansson |                       |                  | THL BB / THL                        |                                          |                                                         | FinnGen Registry Data Operations                                                           |
| Tero                              | Hiekkalinna  |                       |                  | THL BB / THL                        |                                          |                                                         | FinnGen Registry Data Operations                                                           |

## Supplemental Online Content: Nonauthor Collaborators

\*Indicates required information. Only first name, last name, and suffix will appear in PubMed.

| *First Name and Middle Initial(s) | *Last Name       | *Suffix (eg, Jr, III) | Academic Degrees | Institution                   | Location (city, state/province, country) | Role or Contribution, eg, chair, principal investigator | Group (if more than 1 Group listed in the byline) and/or Subgroup (eg, Steering Committee) |
|-----------------------------------|------------------|-----------------------|------------------|-------------------------------|------------------------------------------|---------------------------------------------------------|--------------------------------------------------------------------------------------------|
| Manuel                            | González Jiménez |                       |                  | THL BB / THL                  |                                          |                                                         | FinnGen Registry Data Operations                                                           |
| Kati                              | Donner           |                       |                  | University of Helsinki / FIMM |                                          |                                                         | FinnGen Genotyping                                                                         |
| Priit                             | Palta            |                       |                  | University of Helsinki / FIMM |                                          |                                                         | FinnGen Sequencing Informatics                                                             |
| Kalle                             | Pärn             |                       |                  | University of Helsinki / FIMM |                                          |                                                         | FinnGen Sequencing Informatics                                                             |
| Javier                            | Nunez-Fontarnau  |                       |                  | University of Helsinki / FIMM |                                          |                                                         | FinnGen Sequencing Informatics                                                             |
| Jarmo                             | Harju            |                       |                  | University of Helsinki / FIMM |                                          |                                                         | FinnGen Data Management and IT Infrastructure                                              |
| Elina                             | Kilpeläinen      |                       |                  | University of Helsinki / FIMM |                                          |                                                         | FinnGen Data Management and IT Infrastructure                                              |
| Timo P.                           | Sipilä           |                       |                  | University of Helsinki / FIMM |                                          |                                                         | FinnGen Data Management and IT Infrastructure                                              |
| Georg                             | Brein            |                       |                  | University of Helsinki / FIMM |                                          |                                                         | FinnGen Data Management and IT Infrastructure                                              |
| Alexander                         | Dada             |                       |                  | University of Helsinki / FIMM |                                          |                                                         | FinnGen Data Management and IT Infrastructure                                              |
| Ghazal Awaisa                     |                  |                       |                  | University of Helsinki / FIMM |                                          |                                                         | FinnGen Data Management and IT Infrastructure                                              |
| Anastasia                         | Shcherban        |                       |                  | University of Helsinki / FIMM |                                          |                                                         | FinnGen Data Management and IT Infrastructure                                              |

## Supplemental Online Content: Nonauthor Collaborators

\*Indicates required information. Only first name, last name, and suffix will appear in PubMed.

| *First Name and Middle Initial(s) | *Last Name     | *Suffix (eg, Jr, III) | Academic Degrees | Institution                       | Location (city, state/province, country) | Role or Contribution, eg, chair, principal investigator | Group (if more than 1 Group listed in the byline) and/or Subgroup (eg, Steering Committee) |
|-----------------------------------|----------------|-----------------------|------------------|-----------------------------------|------------------------------------------|---------------------------------------------------------|--------------------------------------------------------------------------------------------|
| Tuomas                            | Sipilä         |                       |                  | University of Helsinki / FIMM     |                                          |                                                         | FinnGen Data Management and IT Infrastructure                                              |
| Tarja                             | Laitinen       |                       |                  | Tampere University Hospital       |                                          |                                                         | FinnGen Trajectory Team                                                                    |
| Harri                             | Siirtola       |                       |                  | University of Tampere             |                                          |                                                         | FinnGen Trajectory Team                                                                    |
| Javier                            | Gracia Tabuena |                       |                  | University of Tampere             |                                          |                                                         | FinnGen Trajectory Team                                                                    |
| Lila                              | Kallio         |                       |                  | Auria Biobank                     |                                          | Biobank director                                        |                                                                                            |
| Sirpa                             | Soini          |                       |                  | THL Biobank                       |                                          | Biobank director                                        |                                                                                            |
| Jukka                             | Partanen       |                       |                  | Blood Service Biobank             |                                          | Biobank director                                        |                                                                                            |
| Kimmo                             | Pitkänen       |                       |                  | Helsinki Biobank                  |                                          | Biobank director                                        |                                                                                            |
| Seppo                             | Vainio         |                       |                  | Northern Finland Biobank Borealis |                                          | Biobank director                                        |                                                                                            |
| Kimmo                             | Savinainen     |                       |                  | Tampere Biobank                   |                                          | Biobank director                                        |                                                                                            |
| Veli-Matti                        | Kosma          |                       |                  | Biobank of Eastern Finland        |                                          | Biobank director                                        |                                                                                            |
| Teijo                             | Kuopio         |                       |                  | Central Finland Biobank           |                                          | Biobank director                                        |                                                                                            |
